# Supplementary material for: Electrospun nanofiber templated assembly of hybrid nanoparticles
Source: Royal Society of Chemistry journal article supplement (doi:10.1039/c8ra00665b), 2018-01-01
Supplement: c8ra00665b1.pdf [file c8ra00665b1.pdf]

## Supporting Information

### **Electrospun nanofiber templated assembly of hybrid nanoparticles**

Zhicheng Liu<sup>a,c</sup>, Zhaodong Yan<sup>a</sup>, Lu Bai<sup>b\*</sup>

a School of Materials Science and Engineering, North University of China, Taiyuan 030051, China

b School of Chemical Engineering and Technology, North University of China, Taiyuan 030051, China

c Department of Mechanical Engineering, National University of Singapore, Singapore, 117574, Singapore

\* Corresponding author: [bailu0919@gmail.com](mailto:bailu0919@gmail.com)

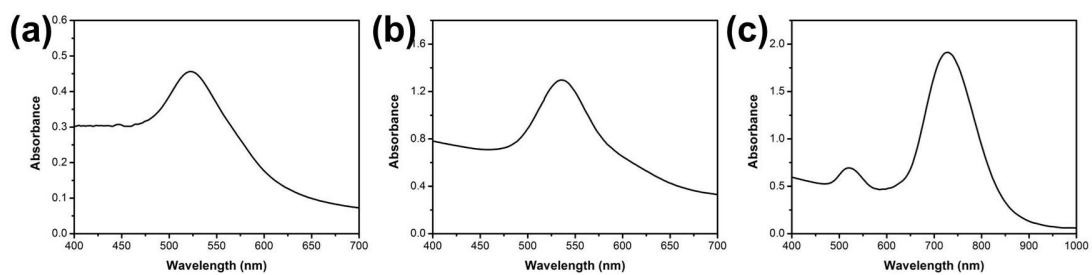

Fig. S1 UV-vis spectra of (a) Au sNPs, (b) Au bNPs, (c) Au NRs.

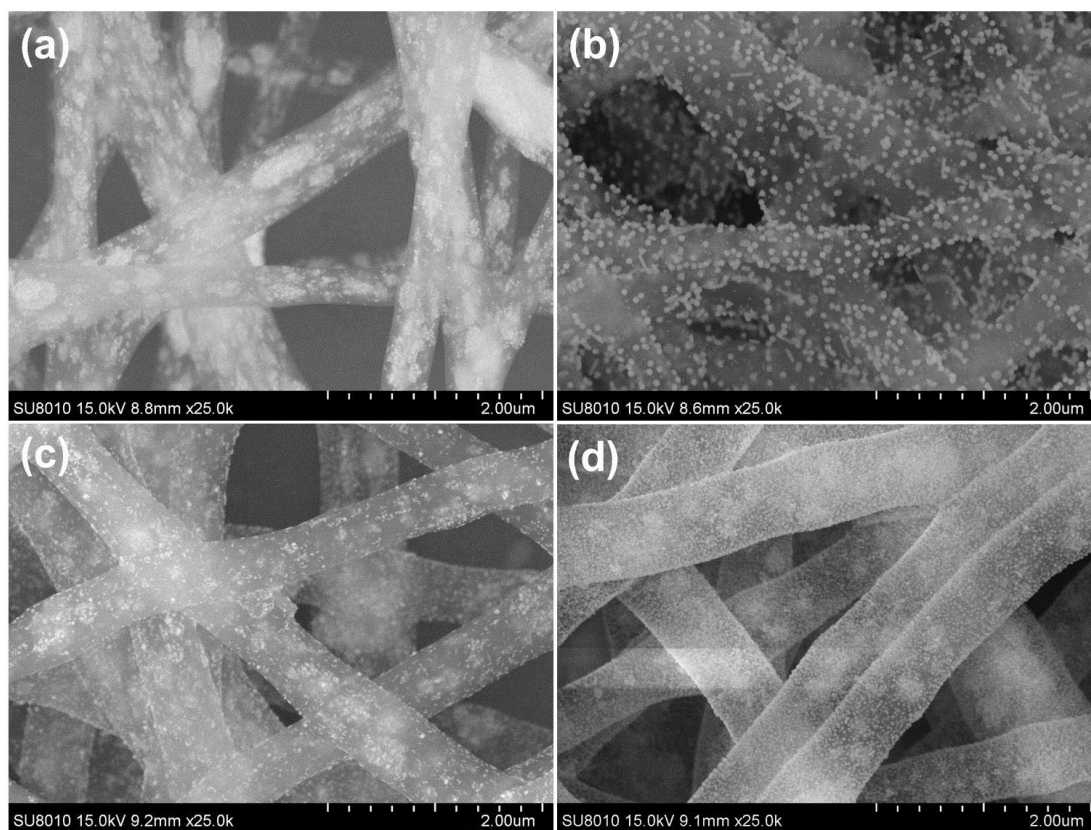

Fig. S2 Low magnification SEM images of the PAA/PVA electrospun nanofibers assembled with (a) Au sNPs, (b) Au sNPs-Au bNPs, (c) Au sNPs-Au NRs and (d) Au sNPs-Pd NCs.

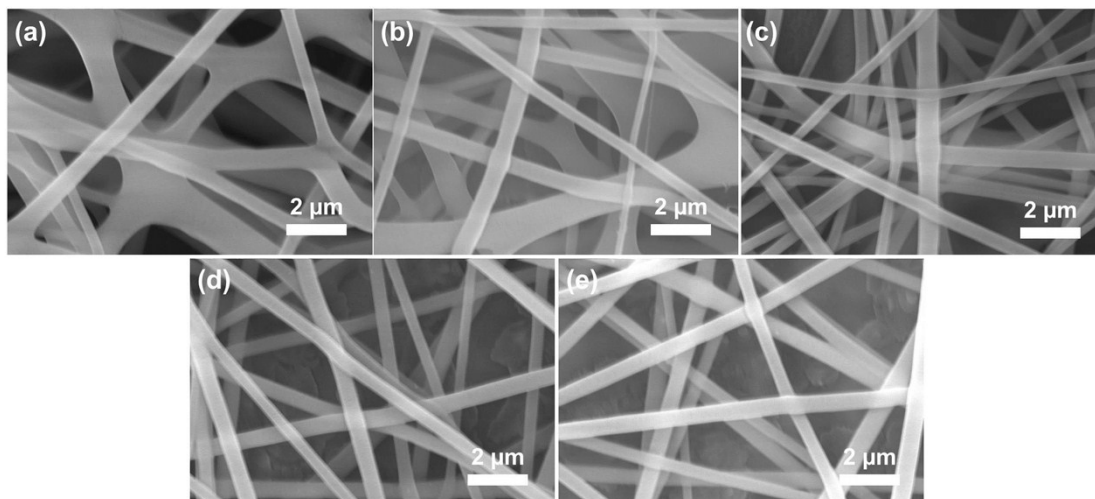

Fig. S3 SEM (S-4300, nanofibers were sputtered with a gold layer) images of the PAA/PVA electrospun nanofibers assembled with Au sNPs. The needle-to-collector distances are (a) 10 cm, (b) 15 cm, (c) 20 cm, (d) 25 cm and (e) 30 cm, respectively.

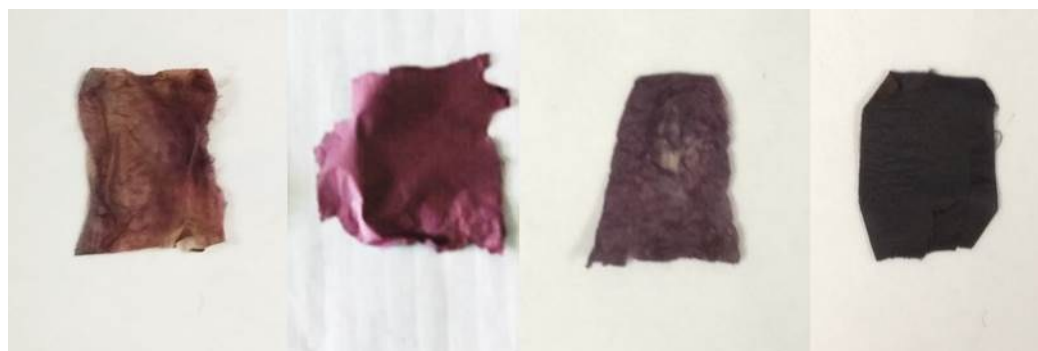

Fig. S4 Photographs of the PAA/PVA electrospun nanofibers assembled with different NPs: from left to right, Au sNPs, Au sNPs-Au bNPs, Au sNPs-Au NRs and Au sNPs-Pd NCs. The size of the membranes is about 1.5 cm  $\times$  1.5 cm.

Table S1 Comparison of the Au sNPs-Au bNPs composite nanofibrous membrane for 4-ATP detection with other nanofiber membranes.

| Refs. | Materials                              | Detection limit |
|-------|----------------------------------------|-----------------|
| 1     | Ag NPs assembled on PEI/PVA nanofibers | $10^{-8}$ M     |
| 2     | plate-like Ag NCs gown on nanofibers   | $10^{-10}$ M    |
| 3     | Ag NPs assembled on PE nanotubes       | $10^{-8}$ M     |

|           |                                              |                      |
|-----------|----------------------------------------------|----------------------|
| 4         | Ag NP functionalized glass fiber             | $5 \times 10^{-8}$ M |
| 5         | Ag NPs decorated on 3D TiO <sub>2</sub> film | $10^{-7}$ M          |
| 6         | Ag NCs assembled tapered fiber probe         | $10^{-7}$ M          |
| 7         | Au-coated magnetic nanoparticles             | $10^{-9}$ M          |
| 8         | Au NPs decorated inverse opal capillary      | $10^{-9}$ M          |
| 9         | Au NPs decorated on PAA/PVA nanofibers       | $10^{-8}$ M          |
| 10        | ZnO nanofibers deposited on silver foil      | $10^{-12}$ M         |
| 11        | Au NPs decorated on cellulose nanofibers     | $10^{-12}$ M         |
| This work | Au sNPs-Au bNPs composite nanofibers         | $10^{-13}$ M         |

References for Table S1:

- [1] T. Yang, J. Ma, S. J. Zhen and C. Z. Huang, *ACS Appl. Mater. Interfaces.*, **2016**, 8, 14802-14811.
- [2] P. Jia, J. Qu, B. Cao, Y. X. Liu, C. Luo, J. H. An and K. Pan, *Analyst*, **2015**, 140, 5190-5197.
- [3] L. B. Huang, Y. Zhou, S. T. Han, Y. Yan, L. Zhou, W. Chen, P. Zhou, X. F. Chen and V. A. L. Roy, *Small*, **2014**, 10, 4645-4650.
- [4] M. Kurita, R. Arakawa and H. Kawasaki, *Analyst*, **2016**, 141, 5835-5841.
- [5] H. C. Dai, Y. J. Sun, P. J. Ni, W. D. Lu, S. Jiang, Y. L. Wang, Z. Li and Z. Li, *Sens. Actuators, B*, **2017**, 242, 260-268.
- [6] Z. L. Huang, X. Lei, Y. Liu, Z. W. Wang, X. J. Wang, Z. M. Wang, Q. H. Mao and G. W. Meng, *ACS Appl. Mater. Interfaces.*, **2015**, 7, 17247-17254.
- [7] J. F. Wang, X. Z. Wu, C. W. Wang, Z. Rong, H. M. Ding, H. Li, S. H. Li, N. S. Shao, P. T. Dong, R. Xiao and S. Q. Wang, *ACS Appl. Mater. Interfaces.*, **2016**, 8, 19958-19967.
- [8] X. W. Zhao, J. Y. Xue, Z. D. Mu, Y. Huang, M. Lu and Z. Z. Gu, *Biosens. Bioelectron.*, **2015**, 72, 268-274.
- [9] Z. C. Liu, Z. D. Yan, L. Jia, P. Song, L. Y. Mei, L. Bai and Y. Q. Liu, *Appl. Surf. Sci.*, **2017**, 403, 29-34.
- [10] W. Song, W. Ji, S. Vantasin, I. Tanabe, B. Zhao and Y. Ozaki, *J. Mater. Chem. A*, **2015**, 3, 13556-13562.
- [11] R. Chen, L. Zhang, X. Li, L. Ong, Y. G. Soe, N. Sinsua, S. L. Gras, R. F. Tabor, X. Wang and W. Shen, *ACS Sens.*, **2017**, 2, 1060-1067.

Table S2 ICP results of the the PAA/PVA electrospun nanofibers assembled with different NPs.

| Sample                    | Au      | Pd      | Loading Contents  |
|---------------------------|---------|---------|-------------------|
| Au sNPs (10.18 mg)        | 1.07 mg | N/A     | Au sNPs: 10.5 wt% |
| Au sNPs-Au bNPs (9.80 mg) | 2.30 mg | N/A     | Au bNPs: 13.0 wt% |
| Au sNPs-Au NRs (10.62 mg) | 2.23 mg | N/A     | Au NRs: 10.5 wt%  |
| Au sNPs-Pd NCs (10.25 mg) | 1.06 mg | 1.31 mg | Pd NCs: 12.8 wt%  |
